# Supplementary material
Source: Springer Nature journal article supplement (https://www.springerprofessional.de/resource/supplementary/13688_2013_10_MOESM18_ESM.pdf/11893766)

CDF of Re-Identification (BK1)

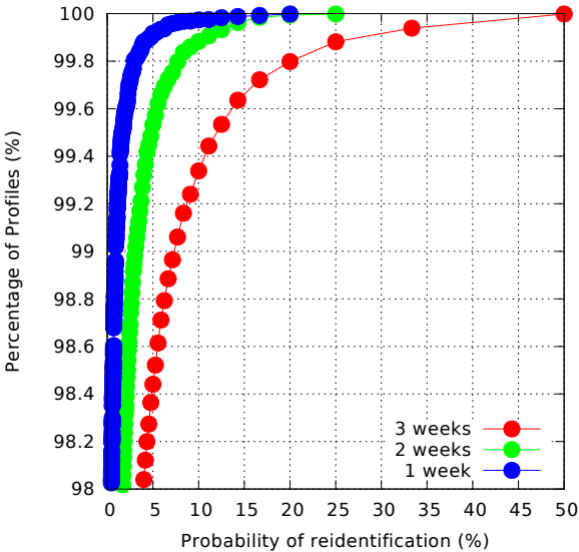

Supplement: MOESM18 [file 11893766]
